# Supplementary material for: Euterpe oleracea Extract (Açaí) Is a Promising Novel Pharmacological Therapeutic Treatment for Experimental Endometriosis
Source: PLoS One. 2016 Nov 16;11(11):e0166059. doi: 10.1371/journal.pone.0166059 (PMC5113045; doi:10.1371/journal.pone.0166059)
Supplement: S2 Table — (XLS) [file pone.0166059.s003.xls]

## Sheet: S2_Table
COX-2 Quantification (%)				ELISA PGE2 (pg/mL)
ANIMALS	CONTROL	AÇAÍ		ANIMALS	CONTROL	AÇAÍ
1	33.3	5.2		1	73.8	29.7
2	30.2	6.6		2	71.7	32.2
3	28.2	5.4		3	68.2	30.9
4	29.3	6.2		4	69.4	30.9
5	29.2	6.4		5	70.5	29.8
6	32.5	6.5		6	73.8	32.7
7	30.2	5.8		7	72.5	33.6
8	30.5	5.5		8	77.5	38.5
9	32.1	5.5		9	73.3	31.6
10	32.5	5.9		10	67.25	36.9
Mean	30.8	5.9		Mean	71.7	32.76
SD	1.7	0.5		SD	3.06	2.94
